# Supplementary material
Source: Springer Nature journal article supplement (https://www.springermedizin.de/resource/supplementary/12939_2012_350_MOESM2_ESM.pdf/9550956)
Supplement: MOESM2 [file 9550956]

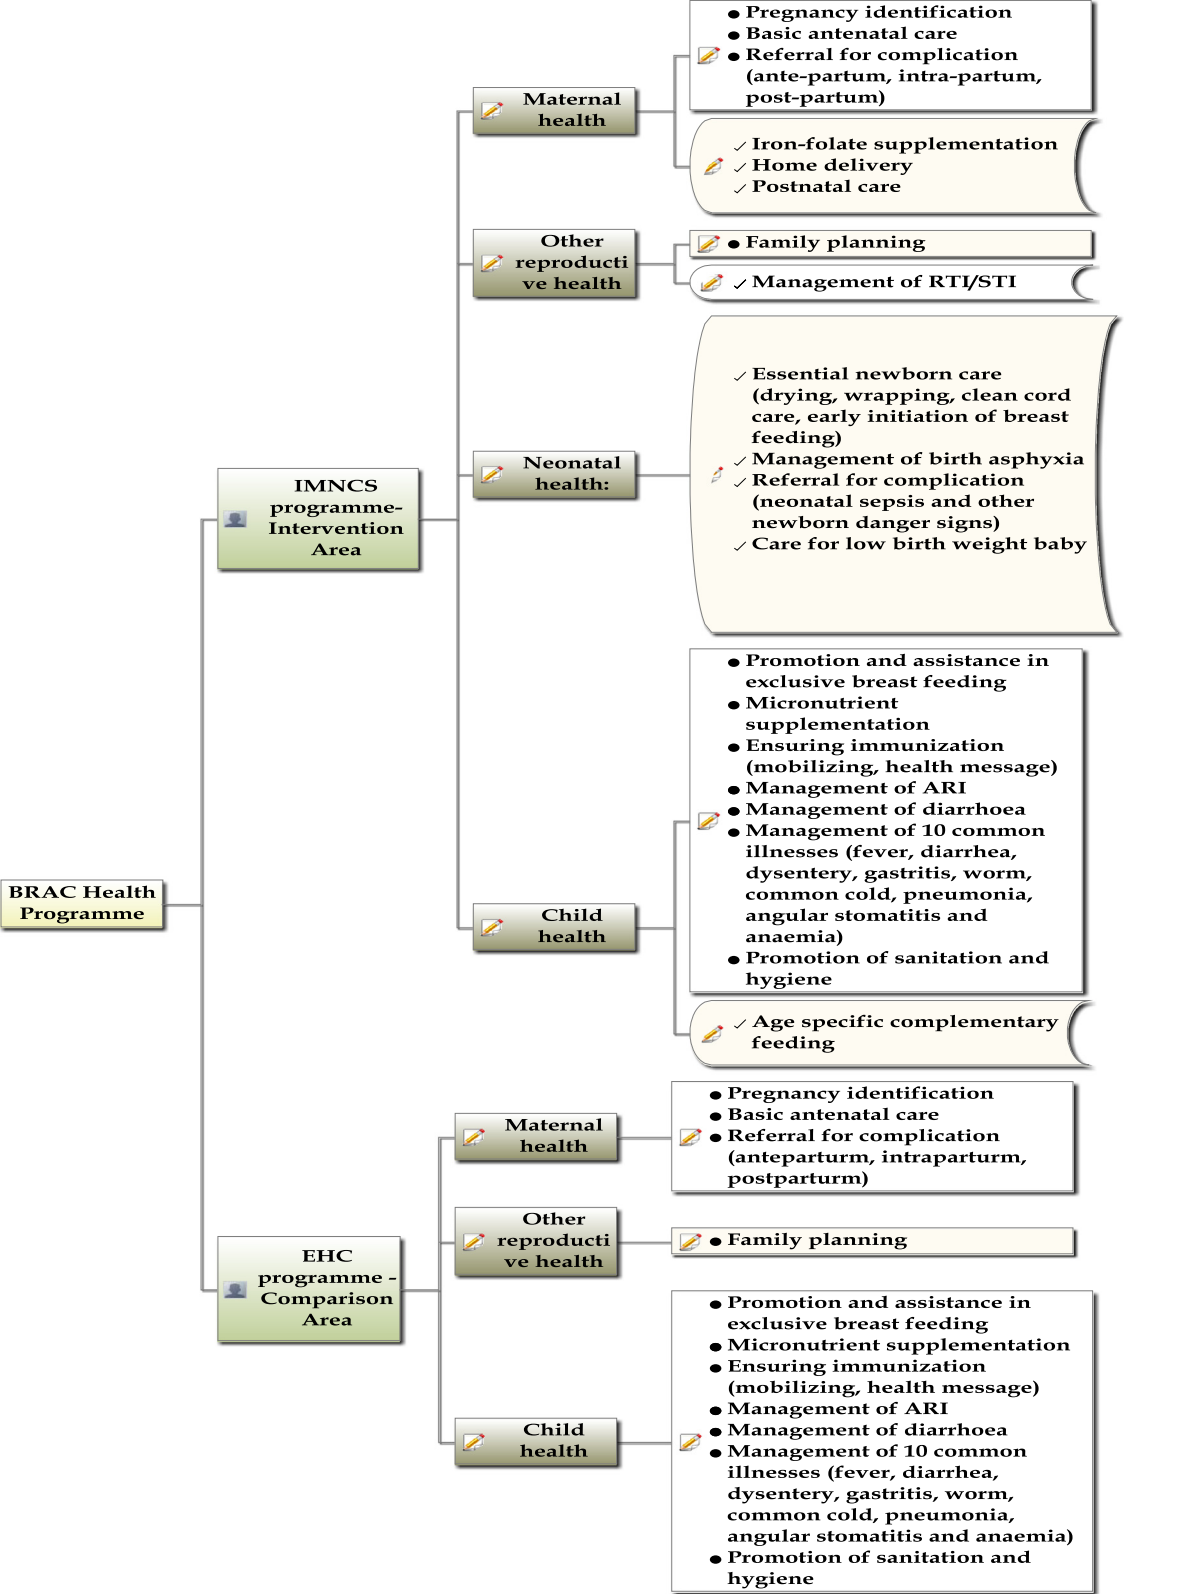

Note- Bullets ( ● ) are common health services in both IMNCS and EHC Interventions, however tick marks ( ✓ ) are additional services provided in Intervention (IMNCS) districts
